1 **Anti-SARS-CoV-2 potential of *Cissampelos pareira* L. identified by Connectivity map-**  
2 **based analysis and in vitro studies**

3

4 Madiha Haider<sup>a,b</sup> Vivek Anand<sup>a,b</sup> Dhvani Dholakia<sup>a,b</sup> M. Ghalib Enayathullah<sup>c</sup> Yash Parekh<sup>c</sup>,  
5 Sushma Ram<sup>c</sup> Surekha Kumari<sup>d,b</sup> Anmol<sup>d,b</sup> Kiran Kumar Bokara<sup>c</sup> Upendra Sharma<sup>d,b</sup> Bhavana  
6 Prasher<sup>\*a,b,e</sup> Mitali Mukerji <sup>\*a,b,e</sup>

7

8 <sup>a</sup>Genomics & molecular medicine, CSIR-Institute of Genomics and Integrative Biology, Delhi,  
9 India-110007, <sup>b</sup>Academy of Scientific and Innovative Research, Ghaziabad, Uttar Pradesh, India  
10 201002, <sup>c</sup>CSIR-Center for Cellular and Molecular Biology, Hyderabad, Telangana, 500007,  
11 India, <sup>d</sup>Chemical Technology Division, CSIR-Institute of Himalayan Bioresource Technology,  
12 Palampur, Himachal Pradesh 176 061, <sup>e</sup>Centre of excellence for Applied developments of  
13 Ayurveda prakriti and genomics, CSIR's Ayurgenomics Unit TRISUTRA, CSIR-IGIB, India

14

15 \*Corresponding Authors

16 Genomics & molecular medicine, CSIR-Institute of Genomics and Integrative Biology, Delhi,  
17 India-110007

18 **Email:** [bhavana.p@igib.res.in](mailto:bhavana.p@igib.res.in)

19 **Email:** [mitali@igib.res.in](mailto:mitali@igib.res.in)\*\*

20 \*\* Current address: Department of Bioscience & Bioengineering, Indian Institute of Technology  
21 Jodhpur, NH 62, Karwar, Rajasthan 342037

22

23

24

25

26

27

28

29

30

31 *Abstract:*

32

33 **Background:** Viral infections have a history of abrupt and severe eruptions through the  
34 years in the form of pandemics. And yet, definitive therapies or preventive measures are  
35 not present.

36 **Purpose:** Herbal medicines have been a source of various antiviral compounds. An  
37 accelerated repurposing potential of antiviral herbs can provide usable drugs and identify  
38 druggable targets. In this study, we dissect the anti-coronavirus activity of *Cissampelos*  
39 *pareira* L (*Cipa*). using an integrative approach.

40 **Methods:** We analysed the signature similarities between predicted antiviral agents and  
41 *Cipa* using the connectivity map (<https://clue.io/>). Next, we tested the anti-SARS-COV-2  
42 activity of *Cipa in vitro*. A three-way comparative analysis of *Cipa* transcriptome, COVID-19  
43 BALF transcriptome and CMAP signatures of small compounds was also performed.

44 **Results:** Several predicted antivirals showed a high positive connectivity score with *Cipa*  
45 such as apcudin, emetine, homoharringtonine etc. We also observed 98% inhibition of  
46 SARS-COV-2 replication in infected Vero cell cultures with the whole extract. Some of its  
47 prominent pure constituents e.g pareirarine, cissamine, magnoflorine exhibited 40-80%  
48 inhibition. Comparison of genes between BALF and *Cipa* showed an enrichment of  
49 biological processes like transcription regulation and response to lipids, to be  
50 downregulated in *Cipa* while being upregulated in COVID-19. CMAP also showed that  
51 Triciribine, torin-1 and VU-0365114-2 had positive connectivity with BALF 1 and 2, and  
52 negative connectivity with *Cipa*.

53

54 **Keywords:** *Cissampelos pareira* L., SARS-CoV-2, BALF, antiviral, whole plant extract,  
55 Connectivity map

56

57 **Abbreviations:**

58 CMAP: Connectivity Map

59 BALF: Bronchoalveolar Lavage fluid

60 ESR1: Estrogen Receptor 1

61 ACE2: Angiotensin-converting enzyme 2

62 SARS: Severe Acute Respiratory Syndrome

63 MERS: Middle East respiratory syndrome

64 HDAC: Histone deacetylase

65

66

67 *Introduction:*

68 SARS-CoV-2, the severe acquired respiratory syndrome agent coronavirus 2, has taken  
69 many lives in the past year and is continuing to create an unsafe environment. Along with  
70 numerous mutations, fast transmission and a wide range of symptoms, lack of a definite  
71 therapeutic intervention has made this virus all the more deadly. Many studies have been  
72 conducted in order to recognize small compound therapeutics effective against SARS-CoV-  
73 2. Interestingly, some estrogen receptor modulators and protein synthesis inhibitors  
74 having potential antiviral against SARS-CoV2 have also been identified (1). It has been  
75 shown that *ESR1* as a drug target can modulate certain coronavirus associated genes. A  
76 group recently demonstrated the downregulation of *ACE2* by estrogen (2).

77

78 *Cissampelos pareira* L. is a commonly used hormone modulator which is used to treat  
79 reproductive disorders and fever. It has also been found to inhibit three serotypes of  
80 dengue (3) and its effect on various hormones has also been evidenced (4). In a previous  
81 study we have observed that *Cipa* can act as both, a protein synthesis inhibitor and an  
82 estrogen receptor inhibitor (5). Many of the drugs positively connected with *Cipa* have  
83 been reported to be a potential antiviral agent. Since there were several overlaps between  
84 the therapeutics predicted to be effective against SARS-CoV-2 and our formulation, we  
85 decided explore the repurposing potential of *Cipa* for this current pandemic.

86

87 *Material and Methods:*

88 **Transcriptome meta-analysis:**

89 We obtained the raw RNA sequencing data from SARS-CoV-2 patients Broncho-alveolar  
90 lavage fluid (BALF) 1 and 2 from the recent publications and analyzed them inhouse  
91 (supplementary information 1.1). The gene expression data for *Cissampelos pareira* L. was  
92 taken from (5), which can be accessed at GSE156445.

93

94 **Functional enrichment and connectivity map of the differentially expressed genes.**

95 The differentially expressed genes were analyzed for functional enrichment using enrichr  
96 (6) and for similar signatures using clue.io (7). The results were then compared with *Cipa*  
97 to find intersections between gene ontologies, enriched gene sets, and connectivity map  
98 perturbations between upregulated genes of BALF 1 and 2 and downregulated genes of  
99 *Cipa* and between downregulated genes of BALF 1 and 2 and upregulated genes of *Cipa*.  
100 Enrichments were also done for the genes whose knockdown signatures score >90  
101 connectivity with *Cipa* and then compared with the upregulated processes and gene sets in  
102 SARS-CoV-2.

103

104 **Collection of plant material and preparation of extract for *in vitro* inhibition assays:**

105 Whole plant of *Cissampelos pareira* L was collected from the Palampur, HP, India (alt. 1350  
106 m). The identification of the plant material was done by a taxonomy expert in CSIR-IHBT,  
107 Palampur and a voucher specimen (no. PLP16688) was deposited in the herbarium of  
108 CSIR-IHBT, Palampur, HP-176,061, India. The plant has been obtained and isolated as per  
109 CSIR, India guidelines (details for extract preparation in supplementary information 1.2).  
110 The pure molecules from roots of the plant were isolated as reported recently (8).

111

### 112 **Cell culture, viral infection and drug treatment for inhibition of SARS-COV-2 by *Cipa*:**

113 The effect of PE50 and PER was tested against the SARS-CoV2 (ASTM, 2015) in a 96-well  
114 tissue culture plates that was seeded with Vero Cells 24 h prior to infection with SARS-  
115 CoV2 (Indian/a3i clade/2020 isolate) in BSL3 facility. After treatment, RNA was isolated  
116 using MagMAX™ Viral/Pathogen Extraction Kit (Applied Biosystems, Thermofisher)  
117 according to the manufacturer's instructions. The details of the experiment and RNA  
118 isolation protocol are given in the supplementary information 1.3.

119

### 120 **TaqMan Real-time RT-PCR assay for Detection of SARS-CoV-2:**

121 The detection of genes specific to SARS-CoV2 was done using COVID-19 RT-qPCR Detection  
122 Kit (Fosun 2019-nCoV qPCR, Shanghai Fosun Long March Medical Science Co. Ltd.)  
123 according to the manufacturer's instructions (details in supplementary information 1.4).  
124 The calculations for the relative viral RNA content and log reduced viral particles was  
125 calculated using the linear regression equation obtained using the RNA extracted from the  
126 known viral particles by RT-qPCR, using N, E and ORF1ab genes specific to SARS CoV2  
127 virus. from the test sample (9).

128

129

### 130 *Results:*

131

### 132 ***Cissampelos pareira* L. shows high positive connectivity with small compounds 133 predicted to inhibit SARS-CoV-2.**

134

135 To assess which among the numerous small compounds predicted to have antiviral  
136 potential against SARS-CoV2 in various studies might have similar signatures among the  
137 same cell lines as *Cipa*, we queried the connectivity map. We observed 7 small compounds  
138 to possess high signature similarity with *Cipa*. These include emetine (99.61), anisomycin  
139 (99.58), cycloheximide (99.86), homoharringtonine (99.51), apcidin (86.32), ruxolitinib  
140 (91.54), and sirolimus (95.45). These small compounds were predicted using different  
141 methods in 4 different studies (Table 1).

142

143

144 ***Cipa* whole extract and single molecule constituents can inhibit SARS-COV-2 in vitro**

145  
146 Since metanalysis highlighted an inhibitory potential of *Cipa* against SARS-COV-2, we tested  
147 the effect of whole plant and root extracts of *Cipa* in Vero cell culture assays infected with  
148 SARS-CoV-2. The relative viral RNA (%) was calculated by considering the values averaged  
149 from N (Nucleoprotein), ORF1ab (19 non-structural proteins, NSP1-16), and E (Envelope)  
150 viral genes. The whole plant aqueous extract showed a definite antiviral activity, evidenced  
151 by decreased relative viral RNA content with a reduction by 57% at 100µg/ml where the  
152 viral particle number reduced from 10<sup>5.9</sup> to 10<sup>5.6</sup> (Figure 1A-C).

153  
154 Next, we wanted to see whether the *Cipa* pure constituents can inhibit SARS-COV-2. The  
155 total alkaloid content in the extract was 46.4 mg/g with cissamine (18.6 mg/g) being the  
156 major one, followed by magnoflorine (12.9 mg/g). The pure molecules namely hayatinin  
157 (US-50), salutaridine (US-DR-CP-2), cissamine (US-CP-3), pareirarine (US-CP-5),  
158 magnoflorine (US-CP-7), aqueous whole plant extract (PE), 50% hydroalcoholic whole  
159 plant extract (PE50) and 50% hydroalcoholic root extract (PER) were tested against SARS-  
160 CoV2 at 200 µM concentration showed relative viral RNA (%) to 44, 58, 45, 16, 63, 24, 2  
161 and 2 respectively in comparison with the virus control (Figure 1D).

162  
163 ***Cipa* transcriptome oppositely regulates several biological pathways compared to**  
164 **COVID-19 infected patient BALF transcriptome**

165  
166 We looked for the differentially expressed genes which were common between *Cipa* and  
167 BALF samples from two studies (10, 11), hereby referred to as BALF-1 and BALF-2  
168 respectively. We observed that 39 genes were common between *Cipa* and BALF-1 and  
169 BALF-2, out of which 29 showed an opposite expression (Table S1). Individually, 134 genes  
170 were common between *Cipa* and BALF-1, and 174 genes common between *Cipa* and BALF-  
171 2. Upon functional enrichment analysis we observed that the genes enriched for regulation  
172 of vascular endothelial growth were upregulated in both BALF-1 and 2 datasets while  
173 being downregulated by *Cipa*. Similarly, while regulation of gene expression was  
174 upregulated by *Cipa* it was downregulated in BALF-1 and BALF-2 data sets (Figure 2A-C).

175  
176 The connectivity map analysis of the gene signatures of BALF-1 and BALF-2 comparison  
177 with *Cipa* results revealed a number of small compounds that had high positive scores with  
178 *Cipa* and negative scores with either BALF transcriptomes. We observed several small  
179 compounds having opposite signature similarities between *Cipa* and BALF. Triciribine,  
180 torin-1 and VU-0365114-2 were three compounds with negative scores for *Cipa* and  
181 positive scores for both BALF 1 and 2 (Figure 2D). Also, knockdown signatures of a number  
182 of genes were found to exhibit opposing scores between *Cipa* and BALF transcriptomes.  
183 Some of these include, MICALL1, CRK, FKBP1A, CBX4, and FGR10P (Figure 2E).

184

185 *Discussion:*

186

187 SARS-COV-2 has shown a very diverse set of clinical presentations in various populations  
188 and among genders within the same population. It has been shown that estrogen can  
189 regulate the expression of ACE-2 receptors (2). Since *Cipa* appears to have *ESR1*  
190 modulatory effects (5), and has been shown to have antiviral potential (3), we  
191 hypothesized it may have inhibitory effect on the novel coronavirus. CMAP analysis of *Cipa*  
192 transcriptome signatures highlights several small compounds having been predicted to  
193 have inhibitory activity against SARS-CoV-2. Among these, emetine, homoharringtonine,  
194 and cycloheximide are known translation inhibitors. These have also been shown to inhibit  
195 Zika and Ebola (12), SARS and MERS (13), and Newcastle disease virus (14). Apcidin, an  
196 HDAC inhibitor has been predicted to inhibit SARS-CoV-2 in a recent study (15).

197

198 *In vitro* experiments for viral inhibition of SARS-COV-2, reveal that all whole plant extracts  
199 of *Cipa* (aqueous and alcoholic) could inhibit the virus at least up to 60%. Hydroalcoholic  
200 whole plant extract showed an inhibition of 98%. The single molecule constituents of *Cipa*  
201 could also inhibit the viral particles, with pareirarine showing the highest inhibition of  
202 80%. This showed that *Cipa* does have the potential to inhibit SARS-CoV-2 virus *in vitro*.  
203 Interestingly, the highest inhibition is shown by the whole plant hydroalcoholic extract  
204 which comprises of various small compound constituents. This suggests a synergistic effect  
205 of the constituents towards viral inhibition.

206

207 We also found that the signatures of the transcriptomic changes in *Cipa* treated MCF7 cells  
208 and BALF from patients' lungs, have interesting overlaps. Among the connected small  
209 compounds tricyribine, torin-1 and VU-0365114-2, tricyribine has been shown to inhibit  
210 Human Immunodeficiency virus sera types 1 and 2 (16). Another study has shown that VU-  
211 0365114-2, which is a muscarinic acetylcholine receptor M5 inhibitor, has repurposing  
212 potential against SARS-CoV-2 (17). While mTOR inhibitor torin-1 may modulate immune  
213 activity and enhance antiviral response, even against SARS-COV-2 (18).

214

215 *Conclusion*

216 In summary, we report here a framework applicable for repurposing of herbal  
217 formulations using an integrated multi-pronged approach using transcriptome-based  
218 connectivity mapping, *in vitro* validation and conjoint analysis with disease signatures. We  
219 demonstrate the potential repurposing of *Cissampelos pareira* L for sars-cov-2 using this  
220 approach.

221

222 **Acknowledgements:**

223 The authors would like to thank Dr. Rakesh Mishra (director-CCMB) for facilitating and  
224 support for SARS-CoV-2 infection model. The authors acknowledge research fellowship  
225 support to MH (University Grants Commission), DD (Department of Biotechnology) SK  
226 (CSIR) and Anmol (DST-INSPIRE).

227  
228 Funding: Council of Scientific and Industrial Research (CSIR) TRISUTRA (MLP-901) and  
229 Center of Excellence on Applied Developments in Ayurveda, Prakriti and Genomics, grant  
230 by Ministry of AYUSH (GAP0183), Govt. of India.

231

232

233 **Conflict of Interest Statement:**

234 The authors declare no conflict of statement

235

236

237 *References:*

- 238 1. D. E. Gordon, *et al.*, A SARS-CoV-2 protein interaction map reveals targets for drug  
239 repurposing. *Nature* (2020) <https://doi.org/10.1038/s41586-020-2286-9>.
- 240 2. K. E. Stelzig, *et al.*, Estrogen regulates the expression of SARS-CoV-2 receptor ACE2 in  
241 differentiated airway epithelial cells. *Am. J. Physiol. Cell. Mol. Physiol.* **318**, L1280–  
242 L1281 (2020).
- 243 3. R. Sood, *et al.*, Cissampelos pareira Linn: Natural Source of Potent Antiviral Activity  
244 against All Four Dengue Virus Serotypes. *PLoS Negl. Trop. Dis.* **9**, 1–20 (2015).
- 245 4. M. Ganguly, M. Kr Borthakur, N. Devi, R. Mahanta, Antifertility activity of the  
246 methanolic leaf extract of Cissampelos pareira in female albino mice. *J.*  
247 *Ethnopharmacol.* **111**, 688–691 (2007).
- 248 5. M. Haider, *et al.*, Transcriptome analysis and connectivity mapping of  
249 &lt;em>Cissampelos pareira</em> L. provides molecular links of ESR1  
250 modulation to viral inhibition. *bioRxiv*, 2021.02.17.431579 (2021).
- 251 6. M. V Kuleshov, *et al.*, Enrichr: a comprehensive gene set enrichment analysis web  
252 server 2016 update. *Nucleic Acids Res.* **44**, W90-7 (2016).
- 253 7. A. Subramanian, *et al.*, A Next Generation Connectivity Map: L1000 Platform and the  
254 First 1,000,000 Profiles. *Cell* (2017) <https://doi.org/10.1016/j.cell.2017.10.049>.
- 255 8. V. Bhatt, *et al.*, Chemical profiling and quantification of potential active constituents  
256 responsible for the antiplasmodial activity of Cissampelos pareira. *J.*  
257 *Ethnopharmacol.* **262**, 113185 (2020).
- 258 9. L. Caly, J. D. Druce, M. G. Catton, D. A. Jans, K. M. Wagstaff, The FDA-approved drug  
259 ivermectin inhibits the replication of SARS-CoV-2 in vitro. *Antiviral Res.* (2020)  
260 <https://doi.org/10.1016/j.antiviral.2020.104787>.
- 261 10. Y. Xiong, *et al.*, Transcriptomic characteristics of bronchoalveolar lavage fluid and  
262 peripheral blood mononuclear cells in COVID-19 patients. *Emerg. Microbes Infect.* **9**,  
263 761–770 (2020).

- 264 11. Z. Zhou, *et al.*, Heightened Innate Immune Responses in the Respiratory Tract of  
265 COVID-19 Patients. *Cell Host Microbe* **27**, 883-890.e2 (2020).
- 266 12. S. Yang, *et al.*, Emetine inhibits Zika and Ebola virus infections through two molecular  
267 mechanisms: inhibiting viral replication and decreasing viral entry. *Cell Discov.* **4**, 31  
268 (2018).
- 269 13. J. Dyllal, *et al.*, Repurposing of clinically developed drugs for treatment of Middle East  
270 respiratory syndrome coronavirus infection. *Antimicrob. Agents Chemother.* **58**,  
271 4885–4893 (2014).
- 272 14. H.-J. Dong, *et al.*, The Natural Compound Homoharringtonine Presents Broad  
273 Antiviral Activity In Vitro and In Vivo. *Viruses* **10** (2018).
- 274 15. K. Liu, *et al.*, Clinical HDAC Inhibitors Are Effective Drugs to Prevent the Entry of  
275 SARS-CoV2. *ACS Pharmacol. Transl. Sci.* **3**, 1361–1370 (2020).
- 276 16. R. G. Ptak, *et al.*, Inhibition of Human Immunodeficiency Virus Type 1 by Triciribine  
277 Involves the Accessory Protein Nef. *Antimicrob. Agents Chemother.* **54**, 1512 LP –  
278 1519 (2010).
- 279 17. Z. Wang, *et al.*, Identification of Repurposable Drugs and Adverse Drug Reactions for  
280 Various Courses of COVID-19 Based on Single-Cell RNA Sequencing Data. *ArXiv*,  
281 arXiv:2005.07856v2 (2020).
- 282 18. Y. Zheng, R. Li, S. Liu, Immunoregulation with mTOR inhibitors to prevent COVID-19  
283 severity: A novel intervention strategy beyond vaccines and specific antiviral  
284 medicines. *J. Med. Virol.* **92**, 1495–1500 (2020).
- 285 19. S. Micholas, S. Jeremy C., Repurposing Therapeutics for COVID-19: Supercomputer-  
286 Based Docking to the SARS-CoV-2 Viral Spike Protein and Viral Spike Protein-Human  
287 ACE2 Interface. *chemRxiv* (2020) <https://doi.org/10.26434/chemrxiv.11871402.v4>.
- 288 20. Y. Zhou, *et al.*, Network-based drug repurposing for novel coronavirus 2019-  
289 nCoV/SARS-CoV-2. *Cell Discov.* **6**, 14 (2020).

290  
291  
292  
293  
294  
295  
296  
297  
298  
299  
300  
301  
302  
303  
304  
305  
306



307 *Table and Figures:*

308 Table 1. Connectivity scores of small compounds with repurposing potential against SARS-  
 309 CoV-2 as predicted by various studies.

310

| Compounds                | Score        | Reference                          |
|--------------------------|--------------|------------------------------------|
| <b>Emetine</b>           | <b>99.61</b> | (Dyall et al., 2014)(13)           |
| Chloroquine              | -45.51       |                                    |
| mefloquine               | -3.93        |                                    |
| Amodiaquine              | -13.11       |                                    |
| Gemcitabine              | 1.59         |                                    |
| Tamoxifen                | -23.6        |                                    |
| Toremifene               | -17.23       |                                    |
| Terconazole              | -14.17       |                                    |
| <b>Anisomycin</b>        | <b>99.58</b> |                                    |
| <b>cycloheximide</b>     | <b>99.86</b> |                                    |
| <b>Homoharringtonine</b> | <b>99.51</b> |                                    |
| Fluspirilene             | -35.73       |                                    |
| Thiothixene              | -1.66        |                                    |
| Fluphenazine             | 17.51        |                                    |
| Chlorpromazine           | -77.85       |                                    |
| Triflupromazine          | -0.35        |                                    |
| Clomipramine             | -11.65       |                                    |
| Imatinib                 | -1.34        |                                    |
| Dasatinib                | -75.92       |                                    |
| Vidarabine               | -2.82        | (Micholas and Jeremy C., 2020)(19) |
| eriodictyol              | -13.82       |                                    |
| phenformin               | 1.23         |                                    |
| <b>Apicidin</b>          | <b>86.32</b> | (Gordon et al., 2020)(1)           |
| Haloperidol              | -0.74        |                                    |
| Entacapone               | 6.41         |                                    |
| Metformin                | 4.37         |                                    |
| H-89                     | -82.31       |                                    |
| Ribavirin                | 7.17         |                                    |
| Midostaurin              | 48.43        |                                    |
| <b>Ruxolitinib</b>       | <b>91.54</b> |                                    |
| Daunorubicin             | -73.76       |                                    |
| Captopril                | 13.92        |                                    |
| Chloramphenicol          | -21.3        |                                    |

|                  |              |                            |
|------------------|--------------|----------------------------|
| Linezolid        | 17.29        | (Y. Zhou et al., 2020)(20) |
| Irbesartan       | 1.09         |                            |
| Equilin          | 22.26        |                            |
| Mesalazine       | 7.09         |                            |
| Mercaptopurine   | 6.02         |                            |
| Paroxetine       | -1.84        |                            |
| <b>Sirolimus</b> | <b>95.45</b> |                            |
| Carvedilol       | -13.58       |                            |
| Dactinomycin     | -39.25       |                            |
| Eplerenone       | 10.74        |                            |
| Oxymetholone     | -2.34        |                            |

311  
312  
313  
314  
315  
316  
317  
318  
319  
320  
321  
322  
323  
324  
325  
326  
327  
328  
329  
330  
331  
332

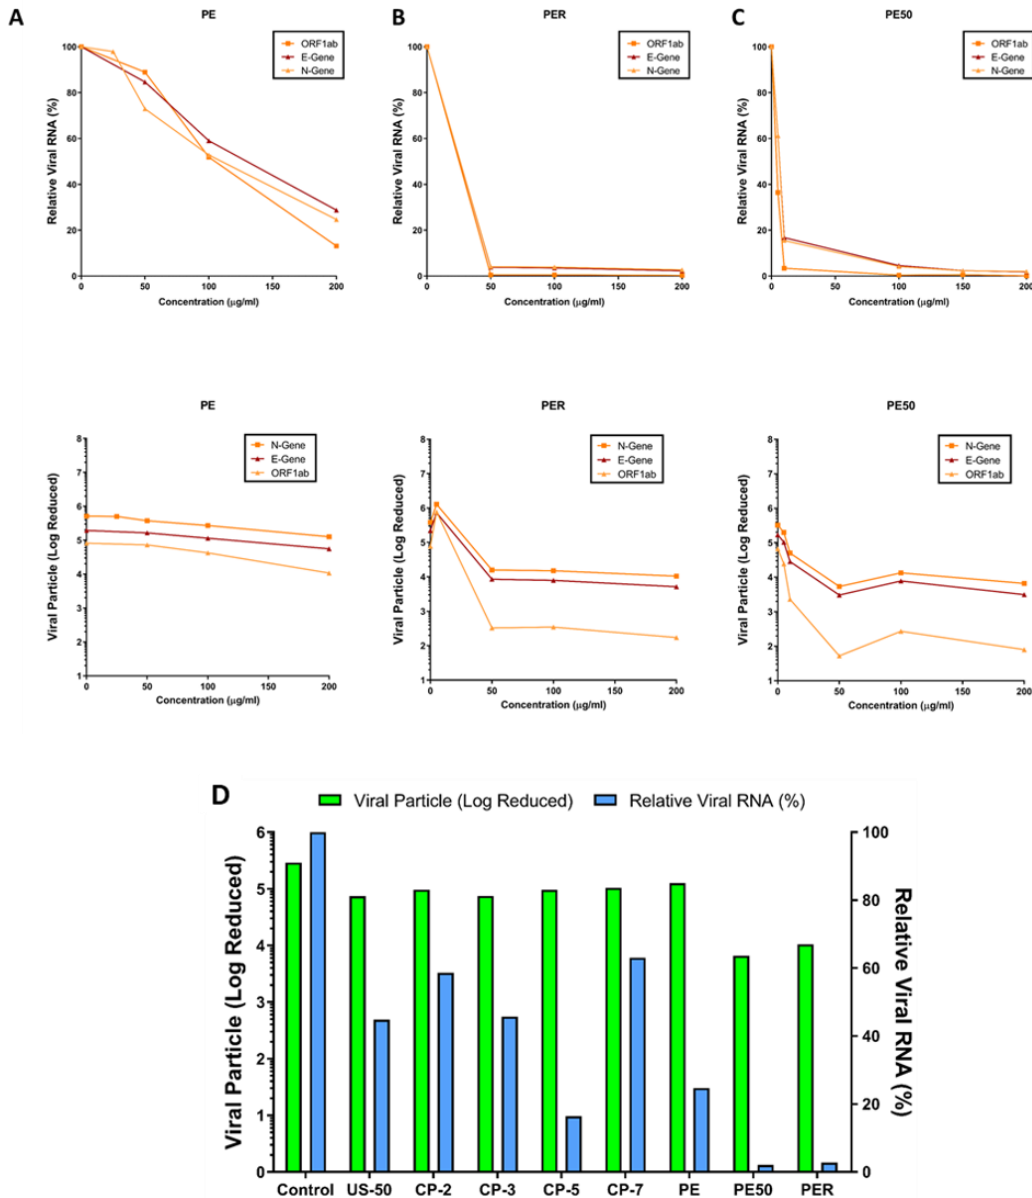

333

334

335 Figure 1: Inhibition of SARS-CoV-2 in vitro by Cipa whole extract and its constituents:  
 336 Relative viral RNA % and Log reduction in viral particles in vero cells upon treatment at 50,  
 337 100, 150 and 200µg of A) whole plant aqueous extract (PE), B) root extract (PER) and C)  
 338 hydro-alcoholic extracts (PE50) of Cipa. D) Sars-cov-2 viral titers inhibition by Cipa  
 339 constituents CP-2 Salutaridine, CP-3 Cissamine, CP-5 pareirarine, CP-7 Magnoflorine, PE  
 340 aqueous extract, PE50 50% hydroalcoholic extract and PER root extract.

341

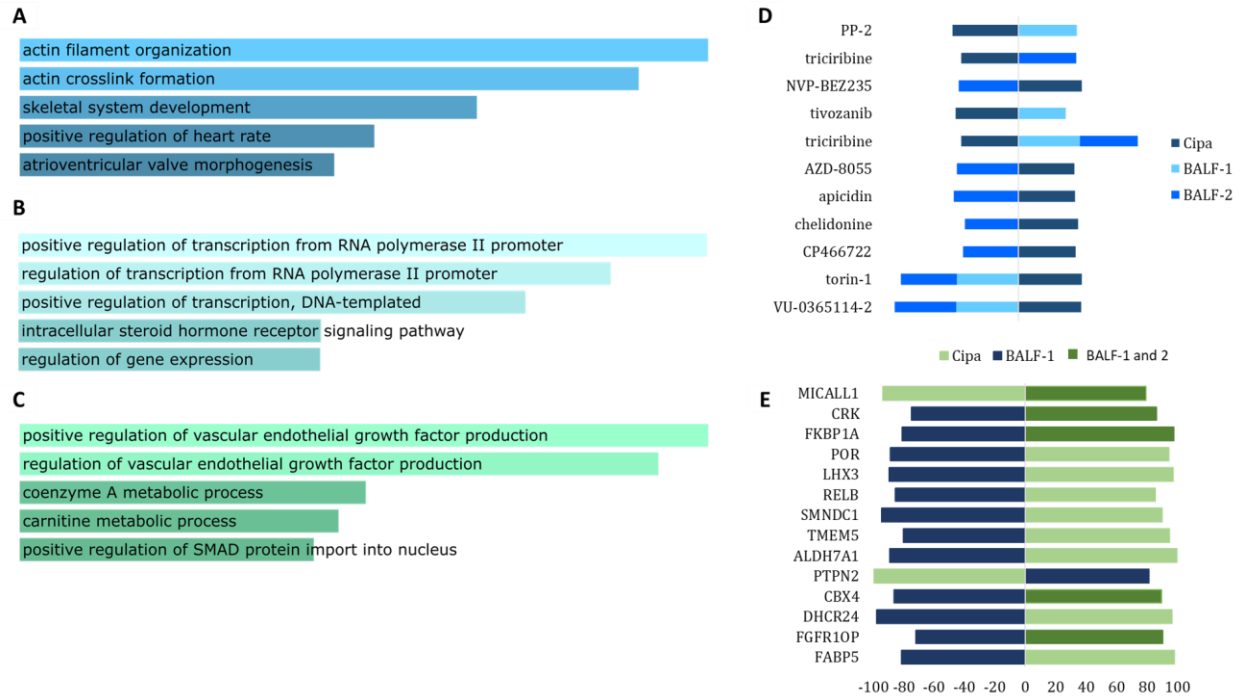

342

343

344 Figure 2: Comparative analysis of Cipa with BALF-1 and BALF-2 transcriptome: Functional  
 345 enrichment of genes common between A) Cipa and BALF-1, B) Cipa and BALF-2 and C)  
 346 Cipa, BALF-1 and BALF-2. D) Small compound signatures common between all three, the  
 347 space on the left of the vertical axis indicates negative signatures while the one on the right  
 348 indicates positive signatures. E) Genetic signatures common between all three, the space on  
 349 the left of the vertical axis indicates negative signatures while the one on the right indicates  
 350 positive signatures.

351

352

353

354

355
